# Supplementary material for: A Scalable Solution Route to Porous Networks of Nanostructured Black Tungsten
Source: MDPI journal article supplement (doi:10.3390/nano11092304), 2021-09-05
Supplement: s1 [file s1]

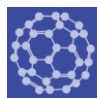

## Article

# A Scalable Solution Route to Porous Networks of Nanostructured Black Tungsten

V. Vinay K. Doddapaneni <sup>1</sup>, Kijoon Lee <sup>2,3</sup>, Tyler T. Colbert <sup>1</sup>, Saereh Mirzababaei <sup>2,3</sup>, Brian K. Paul <sup>2,3</sup>, Somayeh Pasebani <sup>2,3</sup> and Chih-Hung Chang <sup>1,\*</sup>

<sup>1</sup> School of Chemical, Biological, and Environmental Engineering, Oregon State University, Corvallis, OR 97331, USA; doddapav@oregonstate.edu (V.V.K.D.); tycolbert94@gmail.com (T.T.C.)

<sup>2</sup> School of Mechanical, Industrial, and Manufacturing Engineering, Oregon State University, Corvallis, OR 97331, USA; leekij@oregonstate.edu (K.L.); mirzabas@oregonstate.edu (S.M.); brian.paul@oregonstate.edu (B.K.P.); somayeh.pasebani@oregonstate.edu (S.P.)

<sup>3</sup> Advanced Technology and Manufacturing Institute (ATAMI), Corvallis, OR 97330, USA

\* Correspondence: chih-hung.chang@oregonstate.edu; Tel.: +1-541-737-8548

**Citation:** Doddapaneni, V.V.K.;

Lee, K.; Colbert, T.T.;

Mirzababaei, S.; Paul, B.K.;

Pasebani, S.; Chang, C-H. A Scalable

Solution Route to Porous Networks  
of Nanostructured Black Tungsten.

*Nanomaterials* **2021**, *11*, x.

[https://doi.org/10.3390/](https://doi.org/10.3390/nano11092304)

nano11092304

Academic Editor: Ion N. Mihailescu

Received: 18 August 2021

Accepted: 31 August 2021

Published: 5 September 2021

**Publisher's Note:** MDPI stays neutral with regard to jurisdictional claims in published maps and institutional affiliations.

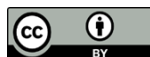

**Copyright:** © 2021 by the authors.

Licensee MDPI, Basel, Switzerland.

This article is an open access article

distributed under the terms and

conditions of the Creative Commons

Attribution (CC BY) license ([https://](https://creativecommons.org/licenses/by/4.0/)

[creativecommons.org/licenses/by/](https://creativecommons.org/licenses/by/4.0/)

4.0/).

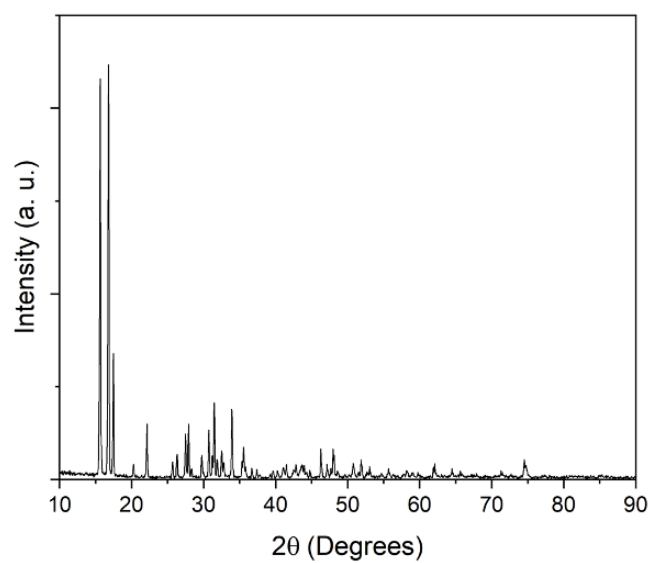

**Figure S1.** XRD of tungsten hexacarbonyl precursor.

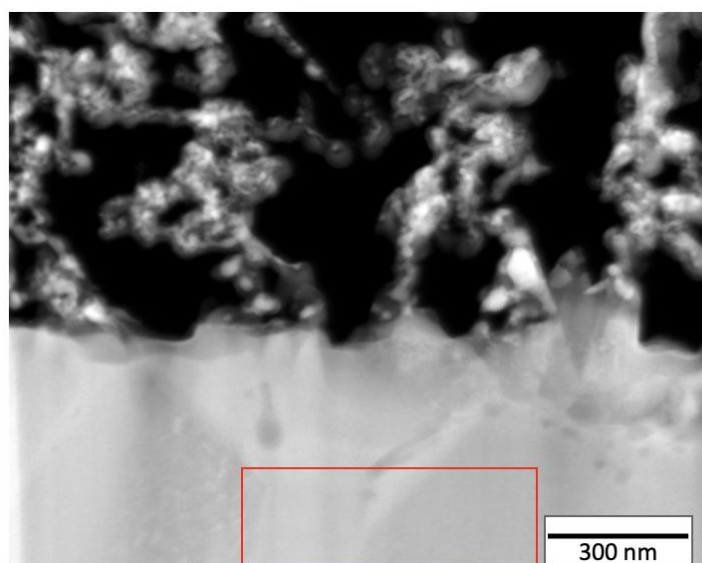

**Figure S2.** STEM/EDS of cross-section.

**Table S1.** Elemental composition of Inconel 625 just below the interface.

| Ele-<br>ments | W    | Ni    | Cr    | Mo   | Fe   | Ta   | Nb   | Si   | O    | C    | Mn   | Al   | Co  | Ti   | Pt          |
|---------------|------|-------|-------|------|------|------|------|------|------|------|------|------|-----|------|-------------|
| Mass<br>%     | 2.96 | 56.39 | 13.93 | 5.66 | 4.27 | 3.77 | 2.03 | 0.41 | 3.11 | 4.27 | 1.01 | 0.64 | 0.8 | 0.29 | <b>0.62</b> |

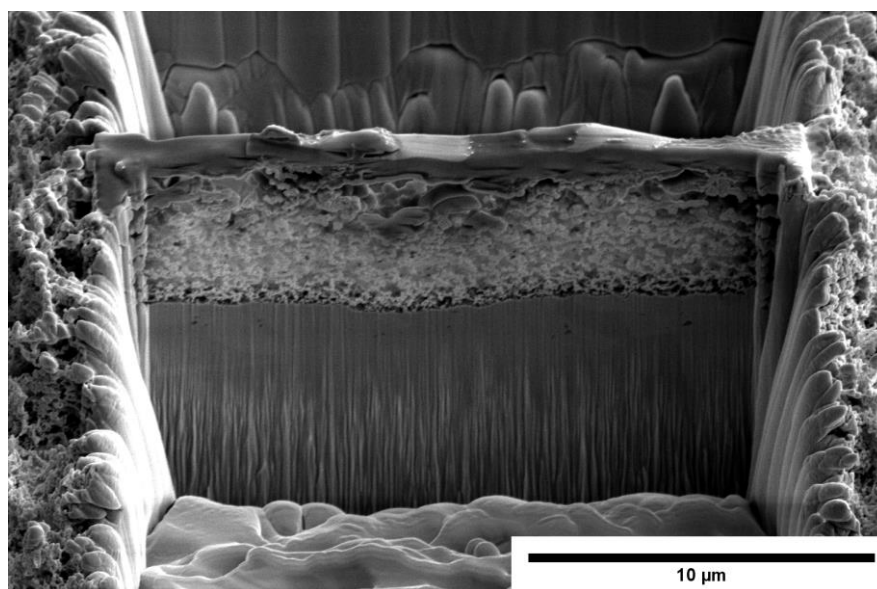

**Figure S3.** Cross-section of the tungsten coating.
